# Supplementary material for: Facile in situ synthesis of a Bi/BiOCl nanocomposite with high photocatalytic activity
Source: Royal Society of Chemistry journal article supplement (doi:10.1039/c2ta01004f), 2013-01-01
Supplement: c2ta01004f.pdf [file c2ta01004f.pdf]

*Supporting Information Available*

## Facile in-situ synthesis of Bi/BiOCl nanocomposite with high photocatalytic activity

Sunxian Weng, Binbin Chen, Liyan Xie, Zuyang Zheng and Ping Liu\*

State Key Laboratory Breeding Base of Photocatalysis, Research Institute of Photocatalysis,  
Fuzhou University, Fuzhou 350002, P. R. China. Fax: +86-591-8377-9239; Tel:  
+86-591-8377-9239; Email: liuping@fzu.edu.cn (P. Liu)

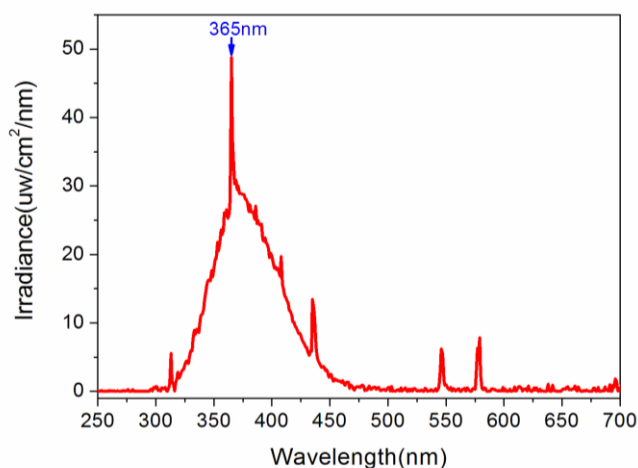

**Fig.S1.** Irradiance spectra of the UV lamp

The light intensities at different wavelengths were measured on a UV meter (International Light Technologies Model ILT950). The distance between the photodetector and the bulb is ~3 cm. The result suggests that the predominant wavelength of the lamps used in our experiment is at 365 nm. Moreover, the lamps were considered to emit a wideband wavelength, including ultraviolet and visible light.

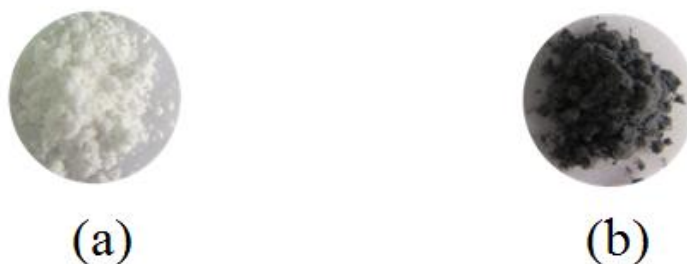

**Fig.S2.** The photo of (a) BiOCl and (b) 5min-Bi/BiOCl

It is found that the colour of BiOCl become grey under UV irradiation with  $(\text{NH}_4)_2\text{C}_2\text{O}_4$ .

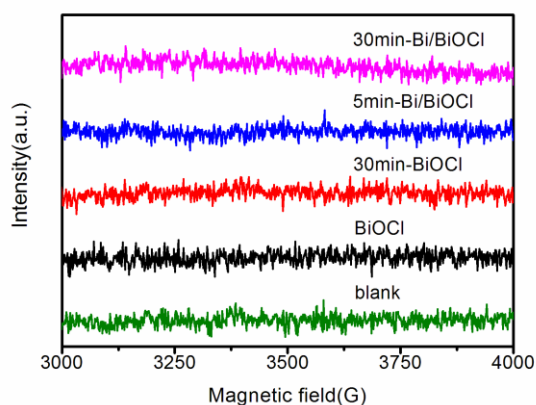

**Fig.S3.** ESR spectra of BiOCl, 30min-BiOCl, 5min-Bi/BiOCl, and 30min-Bi/BiOCl

No ESR signal is observed in Fig. S3, which indicates that there is no oxygen vacancies in all samples.

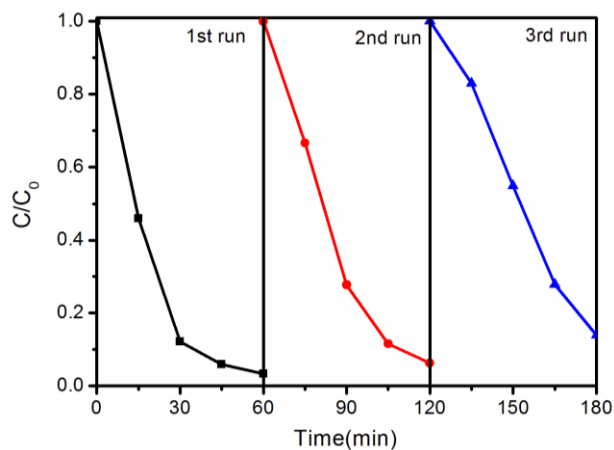

**Fig.S4.** Recycling test for the photocatalytic degradation of MO on 5min-Bi/BiOCl under UV light irradiation (365nm)

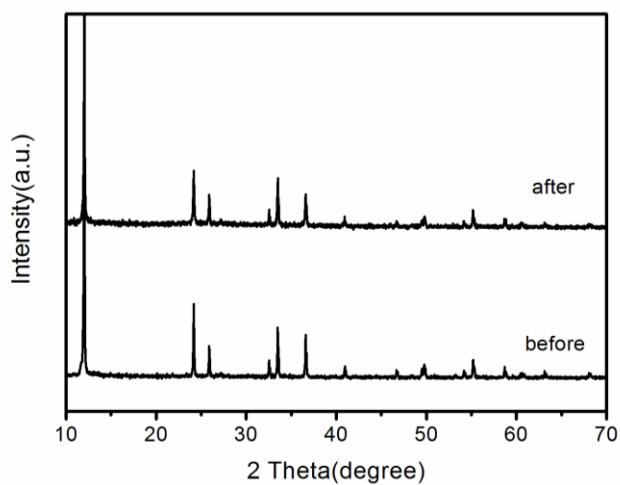

**Fig.S5.** XRD patterns of the 5min-Bi/BiOCl before and after three cycles for the photodegradation of MO

The stability of the 5min-Bi/BiOCl composite is evaluated through the recycle of the used catalyst. For each cycle, catalyst was collected by centrifugation. It was found that the photocatalytic activity of 5min-Bi/BiOCl did not exhibit significant loss after three recycles for the photodegradation of MO, as shown in Fig. S4. The used 5min-Bi/BiOCl is also examined by XRD, and there is no detectable difference between the as-prepared and used samples (see Fig.S5). Thus, it is supposed that the amount of metal Bi may increase rarely in the photocatalytic reactions after three consecutive reaction cycles.

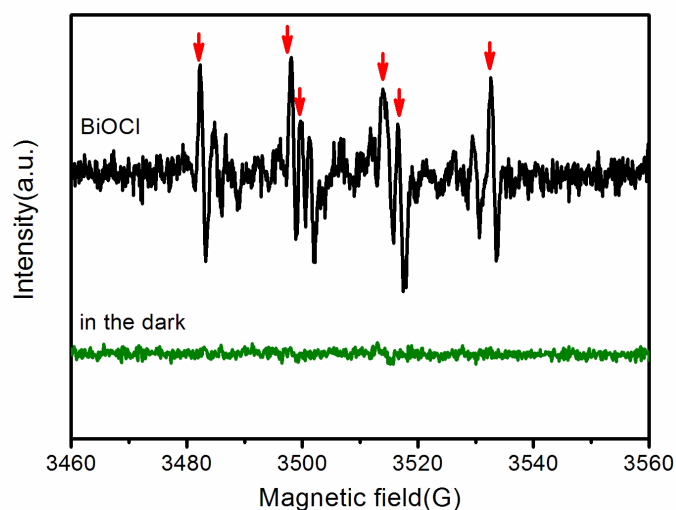

**Fig.S6.** DMPO spin-trapping ESR spectra of BiOCl aqueous suspension in the presence of hole scavenger ((NH<sub>4</sub>)<sub>2</sub>C<sub>2</sub>O<sub>4</sub>) under UV irradiation for DMPO-CO<sub>2</sub>-• radical species

The DMPO-CO<sub>2</sub>-• radical species were generated from BiOCl aqueous suspension (20 mg of BiOCl dispersed in 0.5 mL of ultrapure water) in the presence of 5 mg of hole scavenger and 15 mM DMPO under UV light irradiation by a 300 W xenon lamp (PLS-SXE300C, Beijing Perfect Light Co) with a 365 nm ±15 nm filter. Prior to the experiment, the ultrapure water (resistivity, 14.2 MΩ•cm @ 25 °C) was further purified by active carbon (Alfa Aesar co., 2 mm & down). As shown in Fig.S6 sextet characteristic peaks of the DMPO-CO<sub>2</sub>-• radical species have been clearly observed only in the presence of sample BiOCl and (NH<sub>4</sub>)<sub>2</sub>C<sub>2</sub>O<sub>4</sub> under UV light irradiation.<sup>1, 2</sup> This indicates that (NH<sub>4</sub>)<sub>2</sub>C<sub>2</sub>O not only serves as a hole scavenger, but also can produce active species (CO<sub>2</sub>-• radicals) in the present system (C<sub>2</sub>O<sub>4</sub><sup>2-</sup> + h<sup>+</sup> == CO<sub>2</sub> + CO<sub>2</sub><sup>-•</sup>). The CO<sub>2</sub><sup>-•</sup> species have a strong reductive ability (CO<sub>2</sub>/CO<sub>2</sub><sup>-•</sup>, -2.2 V vs. SCE)<sup>3</sup> and hence can reduce BiOCl to Bi.

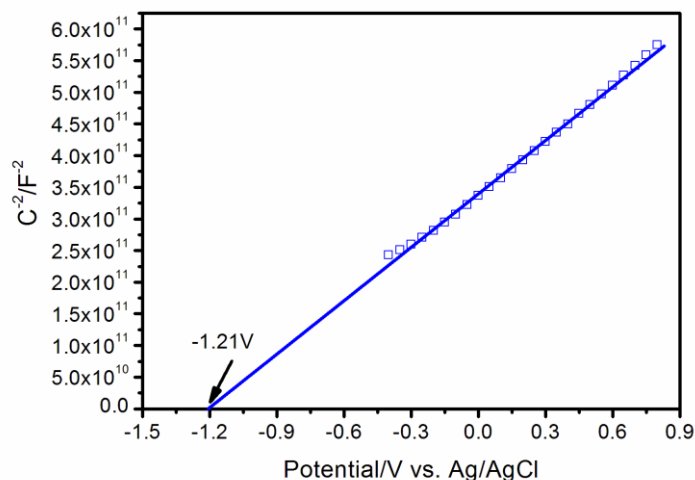

**Fig.S7.** Mott-Schottky plot for the 5min-Bi/BiOCl in 0.2 M  $\text{Na}_2\text{SO}_4$  aqueous solution (pH = 6.8)

The flatband potential ( $V_{fb}$ ) of 5min-Bi/BiOCl obtained by extrapolation of the Mott-Schottky plot approximately equals -1.21 V vs Ag/AgCl, -1.01 V vs standard hydrogen electrode(SHE). Notably, compared to BiOCl, a positive shift of  $V_{fb}$  in 5min-Bi/BiOCl demonstrated a decrease in bending of the band edge, thereby facilitating the electron transfer.<sup>4</sup>

**Note:** In Figure 13, some weak ESR signals are observed in the dark due to the stale DMPO.

#### References

1. F. A. Villamena, E. J. Locigno, A. Rockenbauer, C. M. Hadad and J. L. Zweier, *J. Phys. Chem. A*, 2006, **110**, 13253-13258.
2. W. Wu, G. Liu, S. Liang, Y. Chen, L. Shen, H. Zheng, R. Yuan, Y. Hou and L. Wu, *J. Catal.*, 2012, **290**, 13-17.
3. M.-M. Chang, T. Saji and A. J. Bard, *Journal of the American Chemical Society*, 1977, **99**, 5399-5403.
4. M. Ye, J. Gong, Y. Lai, C. Lin and Z. Lin, *J. Am. Chem. Soc.*, 2012, **134**, 15720-15723.
